# Supplementary material for: Bone Marrow Mesenchymal Stem Cells (BM-MSCs) Improve Heart Function in Swine Myocardial Infarction Model through Paracrine Effects
Source: PubMed Central journal article supplement (PMC4913323; doi:10.1038/srep28250), 2016-06-20
Supplement: srep28250-s1.pdf [file srep28250-s1.pdf]

# **Bone Marrow Mesenchymal Stem Cells (BM-MSCs) Improve Heart Function in Swine Myocardial Infarction Model through Paracrine Effects**

Min Cai, Rui Shen, Lei Song, Minjie Lu, Jianguang Wang, Shihua Zhao, Yue Tang, Xianmin

Meng, Zongjin Li, Zuo-Xiang He

## **Supplemental Figure Legend**

**Fig. S1** Phenotype identification of cultured BM-MSCs. BM-MSCs characterized by flow cytometry were positive for CD44, CD90, and negative for CD34, CD45 and HLA-DR.

**Fig. S2** AHA left ventricular 17 segments diagram

**Fig. S3** PET QPS software results analysis diagram

**Fig. S4** Histology analysis of cardiac tissue sections from the BM-MSCs injection regions. Representative photographs of DAPI-positive nuclei of transplanted BM-MSCs at week 1 and week 4.

CD44

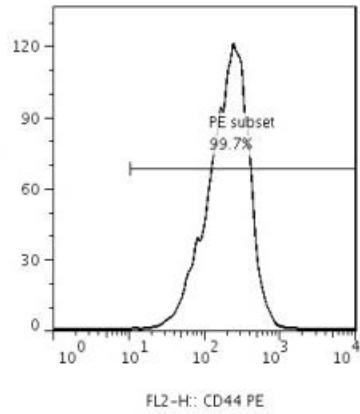

CD90

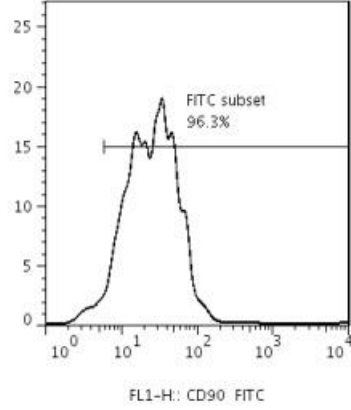

CD45

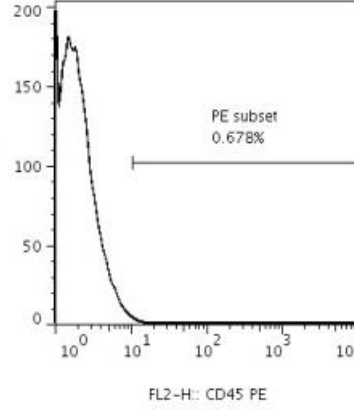

CD34

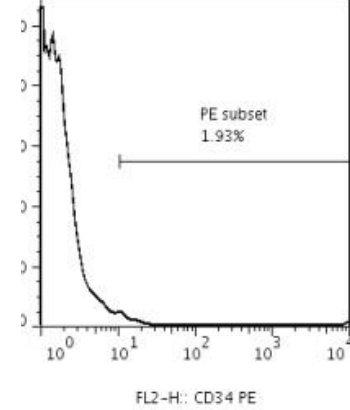

HLA DR

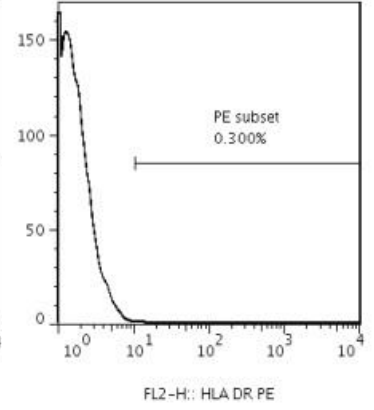

# Left Ventricular Segmentation

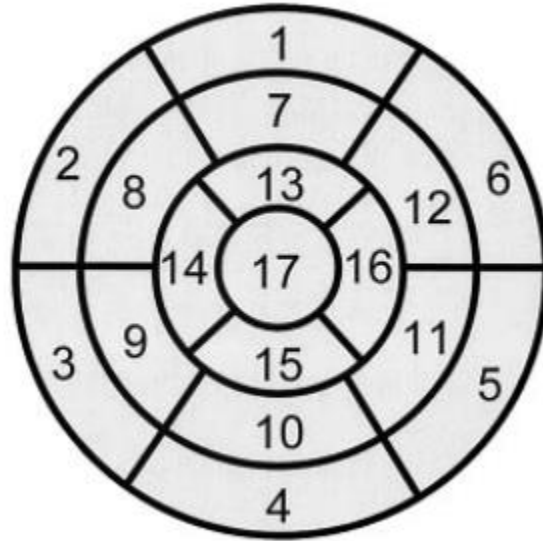

- |                        |                       |                     |
|------------------------|-----------------------|---------------------|
| 1. Basal anterior      | 7. Mid anterior       | 13. Apical anterior |
| 2. Basal anteroseptal  | 8. Mid anteroseptal   | 14. Apical septal   |
| 3. Basal inferoseptal  | 9. Mid inferoseptal   | 15. Apical inferior |
| 4. Basal inferior      | 10. Mid inferior      | 16. Apical lateral  |
| 5. Basal inferolateral | 11. Mid inferolateral | 17. Apex            |
| 6. Basal anterolateral | 12. Mid anterolateral |                     |

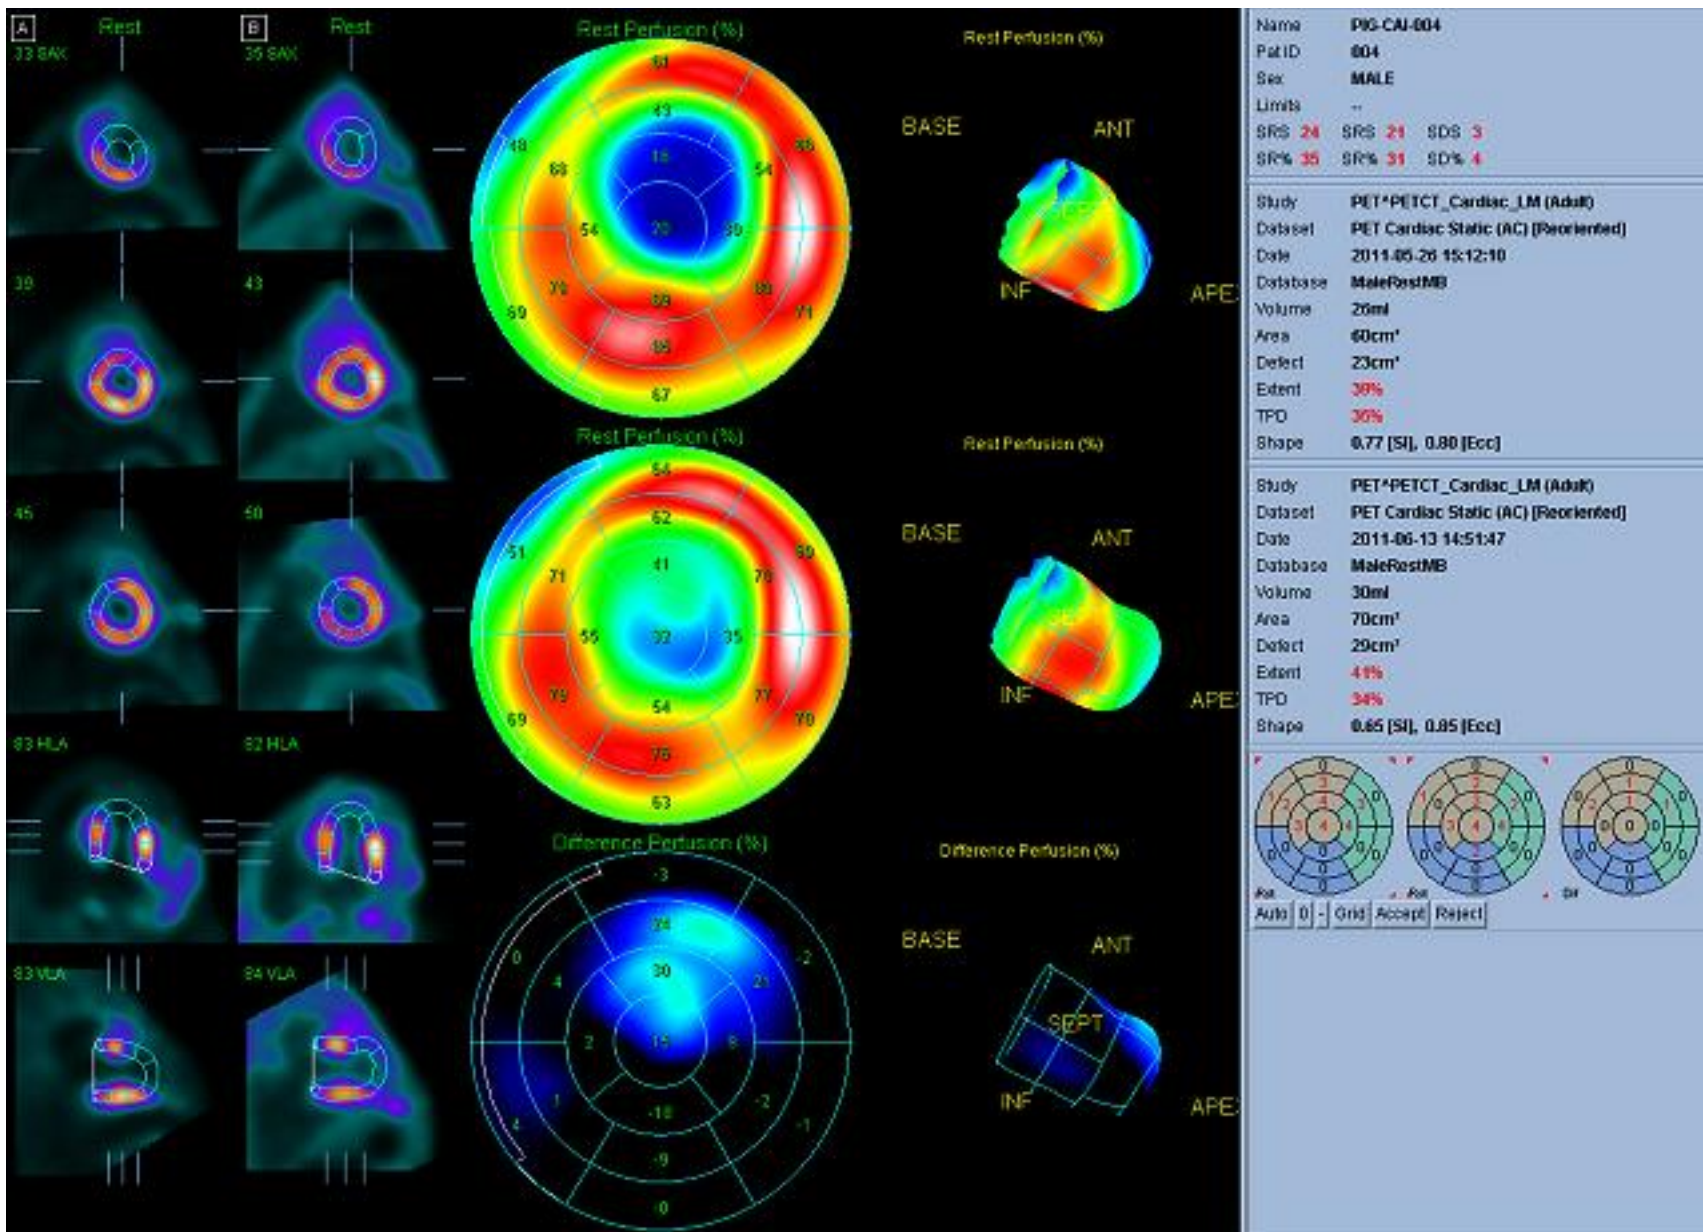

Supplemental Figure 3

**MSCs-1W**

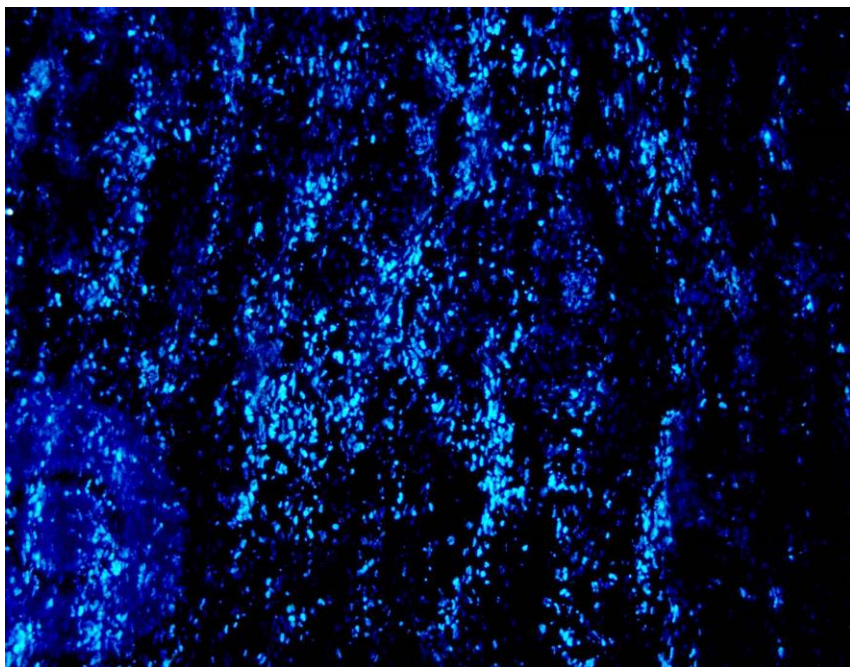

**MSCs-4W**

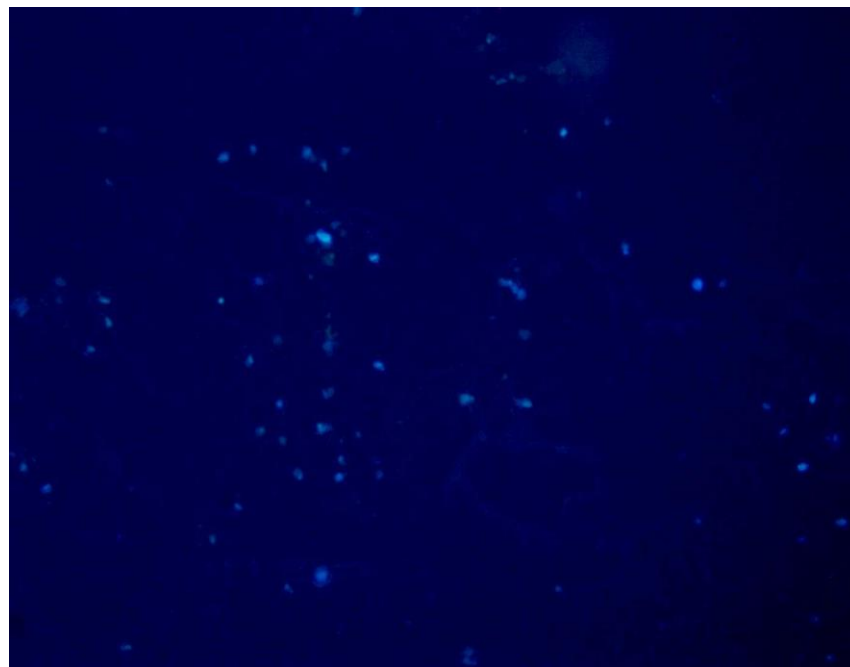

**Supplemental Table 1. Primers Used in This Study**

| Gene symbol    | Primer sequence (5'-3')          | Product size (bp) |
|----------------|----------------------------------|-------------------|
| GLUT1          | F: CCGCTTCCTGCTCATCAACC          | 138bp             |
|                | R: ACCTTCTTCTCCCGCATCATCT        |                   |
| GLUT4          | F: AGTATGTTGCGGATGCTATGGG        | 103 bp            |
|                | R: CCTCGGGTTTCAGGCACTT           |                   |
| PFK            | F: TGTTGAACGACCTCCAGAAAGC        | 119 bp            |
|                | R: CATATCGGTGCCGCAAAAGTC         |                   |
| GAPDH          | F: CTCCCCGTTTCGACAGACAG          | 90 bp             |
|                | R: GCCAAATCCGTTCACTCCGAC         |                   |
| PI3K           | F: GCTGGTCCAGGCTGTGAAAT          | 113 bp            |
|                | R: TCAAGAACCAAAACAAGAAGTGACC     |                   |
| Akt            | F: GATCATGCAGCACCGTTTCTTC        | 112 bp            |
|                | R: GAAATACCTGGTGTCCGTCTCG        |                   |
| mTOR           | F: CCAACAAGATCCTGAAGAACATGT      | 150 bp            |
|                | R: CCCCGAAGTACAAGCGAGAC          |                   |
| 4E-BP1         | F: TGC AGC CAG ACC CCA AGC CG    | 300bp             |
|                | R: CCG CTT ATC TTC TGG GCT ATT G |                   |
| p70s6k         | F: AGG AGG CGG GAC GGC TTT TAC C | 586bp             |
|                | R: CCA AGT AAA AGC AGG CAG TGT C |                   |
| $\beta$ -Actin | F: TGAGATTGGCATGGCTTTATTTGG      | 122 bp            |
|                | R: GTCACCTTCACCGTTCCAGTTT        |                   |

After an initial denaturation at 95 °C for 10 min amplification was performed with 40 cycles of 95 °C for 15 s, 60 °C for 60 s.

**Supplemental Table 2. Myocardial metabolism assessment of PET at week 4**

|                                 | Control (n=10) |               |             | MSCs (n=10)   |               |             | <i>P</i> |
|---------------------------------|----------------|---------------|-------------|---------------|---------------|-------------|----------|
|                                 | 1 week         | 4 week        | difference  | 1 week        | 4 week        | difference  |          |
| Minimum MSI                     | 35.70±3.02     | 37.40±2.28    | 1.70±2.00   | 22.10±3.18    | 34.00±4.25    | 11.90±2.93  | 0.012    |
| Summed MSI                      | 1084.00±21.15  | 1089.90±24.47 | 5.90±27.98  | 1013.50±29.37 | 1075.50±28.30 | 62.00±23.30 | 0.005    |
| SRS                             | 20.90±2.11     | 19.80±1.37    | -1.10±1.57  | 23.80±1.58    | 20.20±2.24    | -0.36±1.53  | 0.287    |
| SRS (%)                         | 30.60±3.09     | 29.00±2.05    | -1.60±2.28  | 35.10±2.34    | 29.80±3.31    | -5.30±2.23  | 0.305    |
| Defect (cm <sup>2</sup> )       | 25.50±2.60     | 29.50±3.31    | 4.00±1.90   | 28.90±2.48    | 27.20±4.06    | -1.70±2.42  | 0.081    |
| Extent (%)                      | 38.90±3.67     | 39.90±2.64    | 1.00±2.09   | 42.40±2.46    | 37.70±3.79    | -4.70±2.60  | 0.119    |
| TPD (%)                         | 31.50±2.83     | 31.80±2.12    | 0.30±1.37   | 36.00±2.57    | 31.70±3.52    | -4.30±2.57  | 0.172    |
| Abnormal segments               | 6.00±0.60      | 5.60±0.72     | -0.40±0.75  | 6.90±0.50     | 5.70±0.79     | -1.20±0.80  | 0.421    |
| Summed MSI in abnormal segments | 314.80±30.50   | 337.70±39.55  | 22.90±18.52 | 323.60±18.99  | 384.60±37.13  | 61.00±21.24 | 0.226    |
| Mean MSI in abnormal segments   | 52.74±1.66     | 55.70±2.20    | 2.95±2.60   | 48.14±2.71    | 56.25±3.54    | 8.12±2.25   | 0.364    |

*P* value, Comparison of the difference between the two groups.

**Supplemental Table 3. Control-4W Group and MSCs-4W Group regional myocardial metabolism assessment of PET**

|                  | Control-4W Group (n=10) |            |            | MSCs-4W Group (n=10) |            |            | <i>P</i> |
|------------------|-------------------------|------------|------------|----------------------|------------|------------|----------|
|                  | 1 week                  | 4 week     | difference | 1 week               | 4 week     | difference |          |
| apical-anterior  | 40.10±3.94              | 44.50±3.36 | 4.60±4.98  | 32.00±5.35           | 44.10±5.90 | 14.80±4.10 | 0.028    |
| mid-anterior     | 64.80±3.33              | 70.00±4.62 | 5.60±3.75  | 57.40±4.00           | 65.30±4.66 | 9.30±2.91  | 0.545    |
| apical-septal    | 55.50±3.21              | 59.40±2.53 | 4.40±3.71  | 52.00±2.55           | 61.60±2.67 | 12.49±3.95 | 0.289    |
| mid-anteroseptal | 64.10±2.75              | 68.10±3.29 | 4.30±3.03  | 62.80±2.85           | 69.50±2.17 | 7.10±2.51  | 0.623    |

*P* value, The comparison of the difference between the two groups.



**Supplemental Table 4. Control-4W Group and MSCs-4 W Group cardiac function assessment**

|                            | Control-4W Group (n=10) |            |            | MSCs-4 W Group (n=10) |            |            | <i>P</i> |
|----------------------------|-------------------------|------------|------------|-----------------------|------------|------------|----------|
|                            | 1 week                  | 4 week     | difference | 1 week                | 4 week     | difference |          |
| LVEF (%)                   | 48.72±2.33              | 49.20±3.13 | 0.47±2.13  | 47.54±2.43            | 54.41±2.62 | 6.87±1.48  | 0.023    |
| EDV (ml)                   | 50.00±4.82              | 53.26±4.58 | 3.26±3.95  | 53.57±1.66            | 52.22±2.44 | -1.35±1.48 | 0.496    |
| ESV (ml)                   | 25.67±2.79              | 26.73±2.51 | 1.06±1.96  | 27.07±1.67            | 22.85±1.91 | -4.22±0.97 | 0.009    |
| SV (ml)                    | 24.33±2.49              | 26.51±2.99 | 2.18±2.35  | 26.52±1.46            | 29.35±1.84 | 2.83±1.11  | 0.650    |
| CO (L/min)                 | 1.73±0.17               | 1.95±0.23  | 0.22±0.27  | 1.96±0.13             | 2.23±0.14  | 0.27±0.10  | 0.472    |
| CI (L/min·m <sup>2</sup> ) | 2.19±0.21               | 2.37±0.26  | 0.18±0.32  | 2.48±0.18             | 2.83±0.14* | 0.36±0.14  | 0.325    |
| LVMASS-ED<br>(g)           | 29.08±1.95              | 29.27±2.03 | 0.19±1.52  | 28.36±2.14            | 27.05±2.02 | -1.31±1.74 | 0.631    |

LVEF, left ventricular ejection fraction; EDV, end-diastolic volume; ESV, end-systolic volume; SV, stroke volume; CO, cardiac output; CI, cardiac index; LVMASS-ED, left ventricular mass- end diastolic.

\* The difference of MSCs-4W Group and Control-4W Group at the 4<sup>th</sup> week, are statistically significant, *P* <0.05

*P* value, The comparison of the difference between the two groups
